# Supplementary material
Source: publisher site journal article supplement (https://www.dovepress.com/article/463676)

**Supplementary Figure 1.** InBodyS10 device


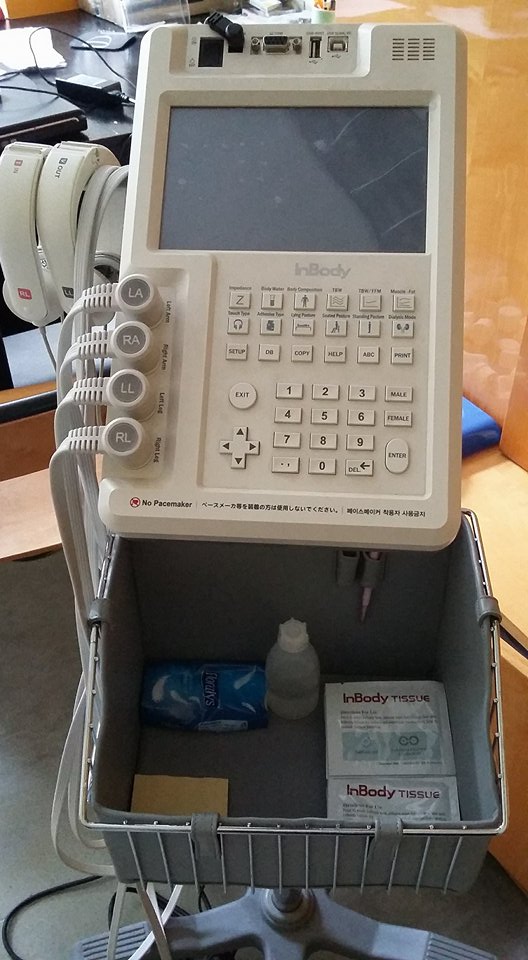


**Supplementary Figure 2.** Photographic illustration of electrode connection during body composition measurement


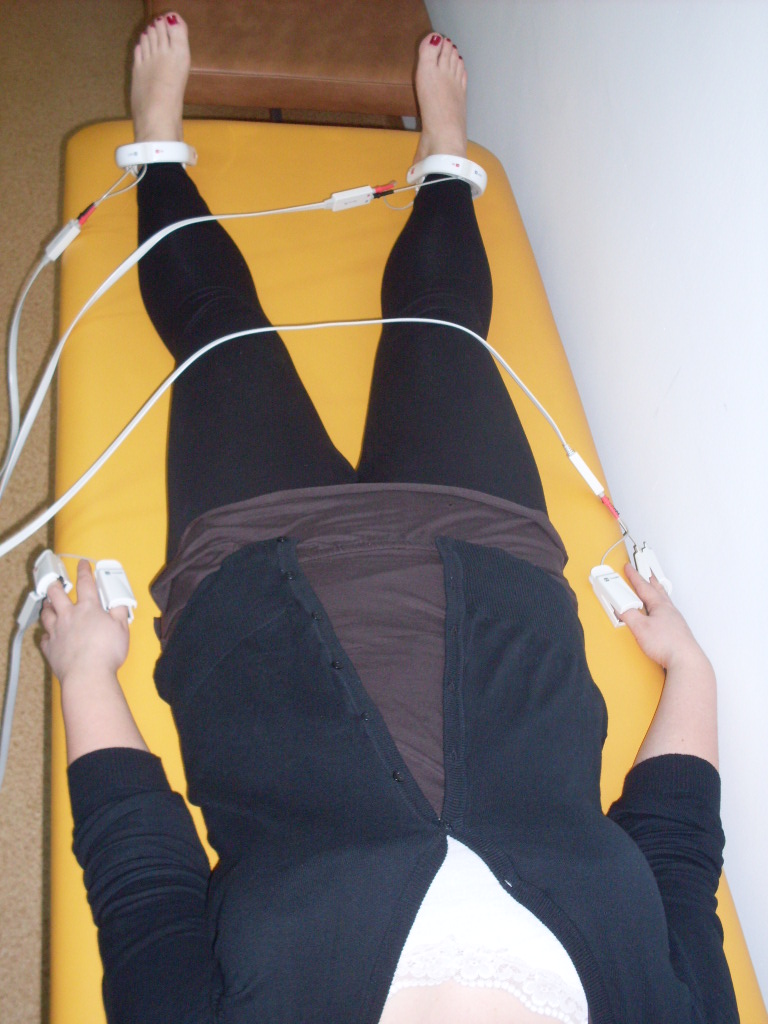

Supplement: Supplementary file 1 [file get_supplementary_file.php]
